# Supplementary material for: Characterization of Chromatin Accessibility in Fetal Bovine Chondrocytes
Source: MDPI journal article supplement (doi:10.3390/ani13111875), 2023-06-05

**Figure S1.** The size of fragments generated by transposase. The horizontal axis shows the fragment length (bp); The vertical axis shows the normalized read density ( $\times 10^{-3}$ ).

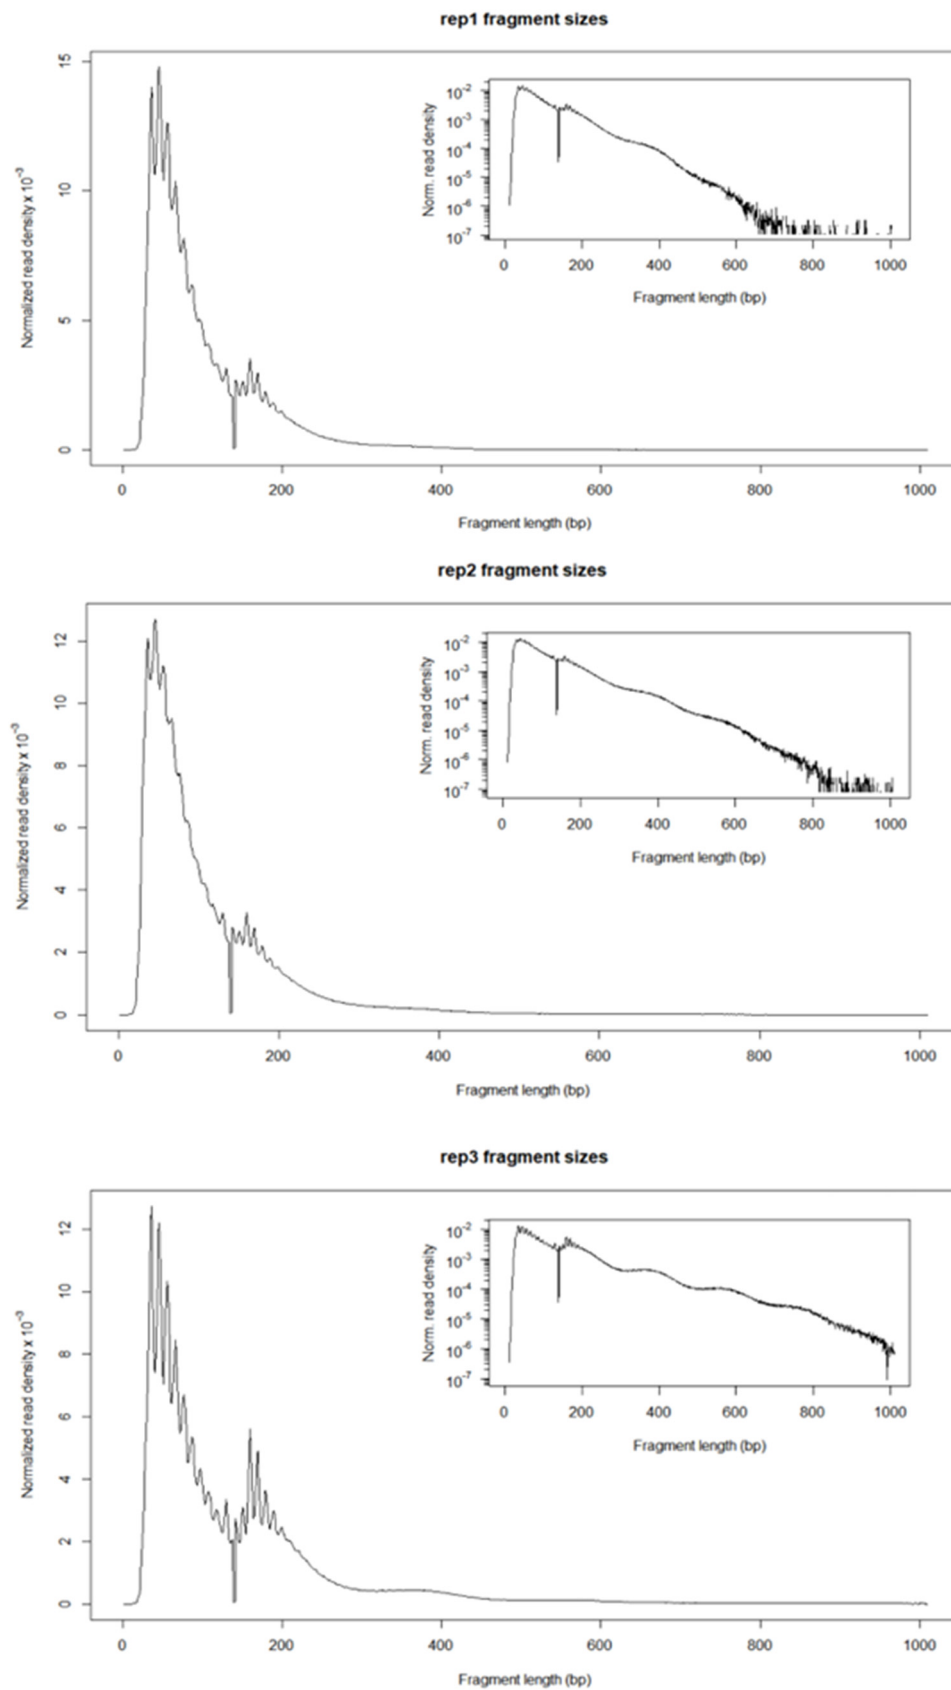

Supplement: s1 [file s1]
